September 2013

# PSYCHIATRIC SERVICES

A Journal of the  
American Psychiatric  
Association

- ◆ Picturing Recovery:  
Use of Photovoice in  
Participatory Research
- ◆ Integrated Care:  
Recent Initiatives  
in New York State
- ◆ Criminal Justice  
Diversion Programs:  
Are They Effective?
- ◆ Is Mental Health Care  
Being Overlooked in  
ACO Implementation?

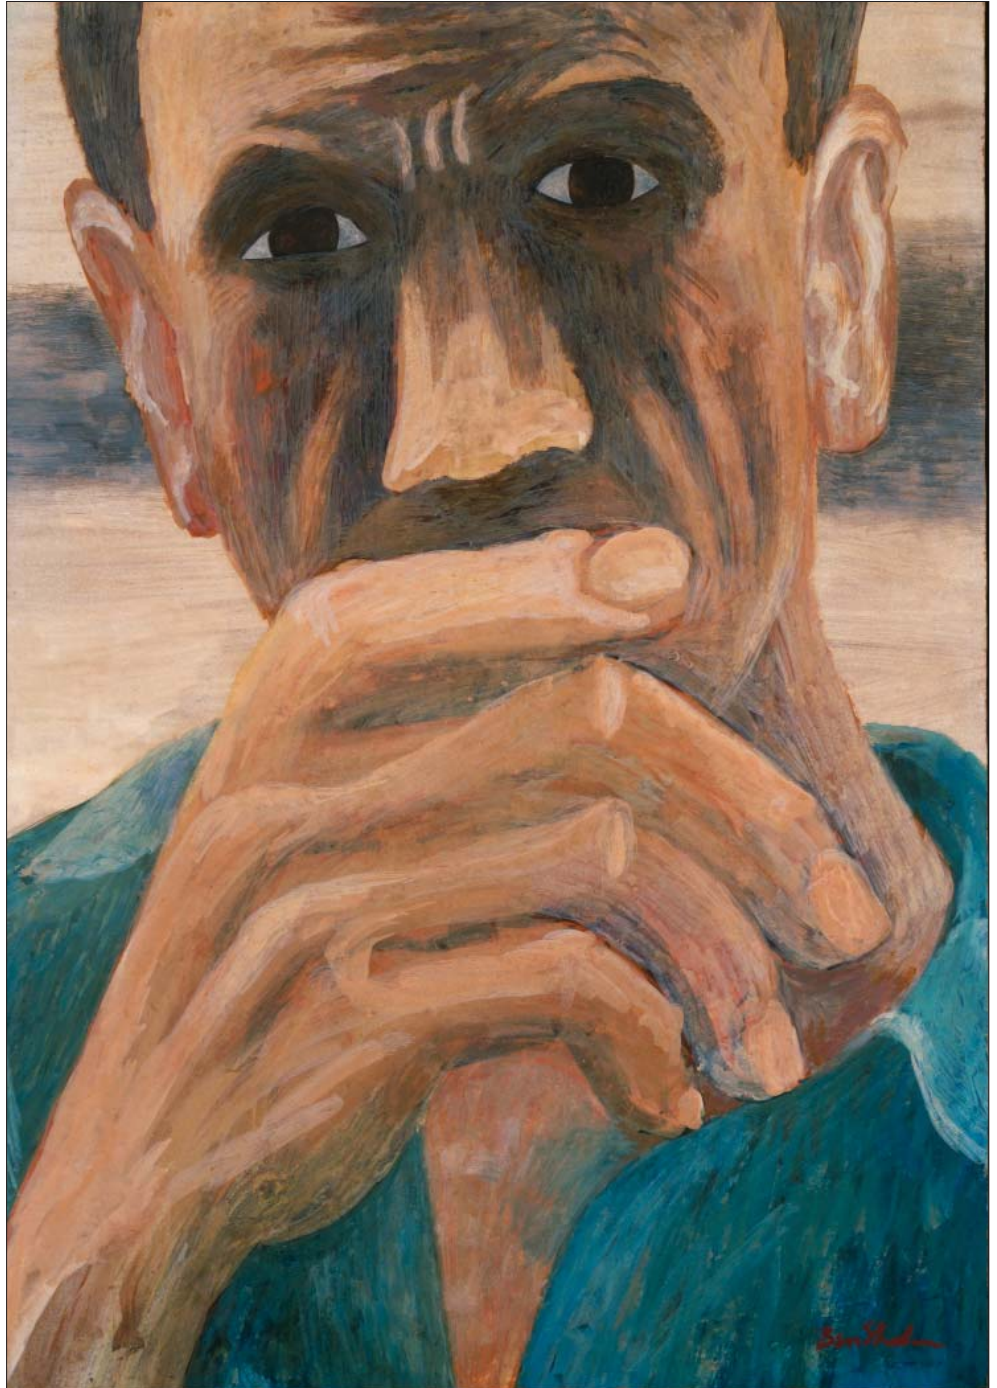

Source: http://ps.psychiatryonline.org/doi/suppl/10.1176/ps.2013.64.issue-9/suppl_file/cover.pdf
